1 Efficient transposon mutagenesis mediated by an IPTG-controlled conditional suicide  
2 plasmid

3

4 Santa S. Naorem<sup>†</sup>, Jin Han<sup>†</sup>, Stephanie Y. Zhang, Junyi Zhang, Lindsey B. Graham,  
5 Angelou Song, Cameron V. Smith, Fariha Rashid, and Huatao Guo\*

6

7 Department of Molecular Microbiology and Immunology, University of Missouri School  
8 of Medicine, Columbia, MO 65212, USA

9

10 Running title: IPTG-controlled mutagenesis and plasmid curing

11

12 Author contact information:

13 Santa S. Naorem: [naorems@health.missouri.edu](mailto:naorems@health.missouri.edu).

14 Jin Han: [hajin@health.missouri.edu](mailto:hajin@health.missouri.edu).

15 Stephanie Y. Zhang: [stephzhang9@gmail.com](mailto:stephzhang9@gmail.com).

16 Junyi Zhang: [jzzyf@mail.missouri.edu](mailto:jzzyf@mail.missouri.edu).

17 Lindsey B. Graham: [lbgrm5@mail.missouri.edu](mailto:lbgrm5@mail.missouri.edu).

18 Angelou Song: [asmq7@mail.missouri.edu](mailto:asmq7@mail.missouri.edu).

19 Cameron V. Smith: [cvsg2d@mail.missouri.edu](mailto:cvsg2d@mail.missouri.edu).

20 Fariha Rashid: [rashidf@slu.edu](mailto:rashidf@slu.edu).

21

22 \*Address correspondence to Huatao Guo, [guohua@missouri.edu](mailto:guohua@missouri.edu).

23 <sup>†</sup>S.S.N. and J.H. contributed equally to this work.

24

25

26 Key Words: transposon mutagenesis; IPTG; conditional suicide plasmid; *Escherichia*

27 *coli*; *Pseudomonas*; *Acinetobacter*

28

29

30 **Abstract**

31 **Background:** Transposon mutagenesis is highly valuable for bacterial genetic and  
32 genomic studies. The transposons are usually delivered into host cells through  
33 conjugation or electroporation of a suicide plasmid. However, many bacterial species  
34 cannot be efficiently conjugated or transformed for transposon saturation mutagenesis.  
35 For this reason, temperature-sensitive (*ts*) plasmids have also been developed for  
36 transposon mutagenesis, but prolonged incubation at high temperatures to induce *ts*  
37 plasmid loss can be harmful to the hosts and lead to enrichment of mutants with adaptive  
38 genetic changes. In addition, the *ts* phenotype of a plasmid is often strain- or species-  
39 specific, as it may become non-*ts* or suicidal in different bacterial species.

40 **Results:** We have engineered several conditional suicide plasmids that have a broad  
41 host range and whose loss is IPTG-controlled. One construct, which has the highest  
42 stability in the absence of IPTG induction, was then used as a curable vector to deliver  
43 hyperactive miniTn5 transposons for insertional mutagenesis. Our analyses show that  
44 these new tools can be used for efficient and regulatable transposon mutagenesis in  
45 *Escherichia coli*, *Acinetobacter baylyi* and *Pseudomonas aeruginosa*. In *P. aeruginosa*  
46 PAO1, we have used this method to generate a Tn5 insertion library with an estimated  
47 diversity of  $\sim 10^8$ , which is  $\sim 2$  logs larger than the best transposon insertional library of  
48 PAO1 and related *Pseudomonas* strains previously reported.

49 **Conclusion:** We have developed a number of IPTG-controlled conditional suicide  
50 plasmids. By exploiting one of them for transposon delivery, a highly efficient and broadly  
51 useful mutagenesis system has been developed. As the assay condition is mild, we  
52 believe that our methodology will have broad applications in microbiology research.

53

## 54 **Background**

55 Transposon mutagenesis is a powerful technique for bacterial genetic and genomic  
56 studies. One of the most widely used transposons is derived from Tn5. The Tn5  
57 transposon contains two IS50 elements as inverted terminal repeats (Additional file 1:  
58 Figure S1) [1, 2]. Both IS50 and Tn5 can be mobilized by their encoded transposase (Tnp)  
59 protein, which recognizes two 19 base pair (bp) sequences at their ends, namely outside  
60 end (OE) and inside end (IE), for transposition [2]. OE and IE differ by 7 bp (Additional  
61 file 1: Figure S1). As Tn5 insertion is almost completely random, it can insert into any  
62 gene in a bacterium. The native Tn5/IS50 is not very active, thus avoiding overt  
63 deleterious effect on their hosts, but hyperactive mutants have been engineered as  
64 genetic manipulation tools [2, 3]. The most active one contains a mosaic sequence of OE  
65 and IE (mosaic end; ME) at the transposon termini and an engineered *tnp* gene encoding  
66 a highly active transposase enzyme (Tnp<sup>H</sup>), which together increase Tn5 transposition by  
67 more than 1000-fold.

68 Transposons for insertional mutagenesis are usually delivered into bacteria  
69 through conjugation of a suicide plasmid [4-6]. Insertion mutants are then selected as the  
70 transposons are tagged with an antibiotic-resistance gene. The success of a transposon  
71 mutagenesis assay, especially a saturation mutagenesis assay, requires generation of  
72 an insertion library with high diversity, which requires efficient plasmid conjugation and  
73 transposon transposition. However, conjugation is inefficient in many bacterial species.  
74 Occasionally, electroporation has also been used to deliver transposon-containing  
75 suicide plasmids for mutagenesis, but low library diversities were often achieved using

76 such approaches [7-9]. To perform efficient transposon mutagenesis in these organisms,  
77 temperature-sensitive (*ts*) plasmids are sometimes used for transposon delivery [10-16].  
78 However, many organisms do not have a *ts* and easily manipulatable plasmid, and  
79 sometimes a *ts* plasmid in one organism is either non-*ts* or suicidal in a different organism  
80 [10, 14, 17]. In addition, a high temperature is often required to cure the *ts* plasmids after  
81 mutagenesis, which can be inhibitory to cell growth and may result in selection of mutants  
82 with adaptive genetic changes [10, 11, 14].

83 In this study, we have developed an efficient and regulatable transposon  
84 mutagenesis tool that exploits an IPTG-controlled conditional suicide plasmid. It contains  
85 an RSF1010 replicon, an IncQ-type replication origin that allows plasmid replication in  
86 most Gram-negative bacteria, as well as a few Gram-positive bacteria [18]. It is relatively  
87 small, so it can be easily modified. To control plasmid replication by IPTG, a second copy  
88 of the plasmid-encoded *repF* repressor gene is cloned downstream of the *Escherichia*  
89 *coli tac* promoter. For efficient and regulatable transposon mutagenesis, we used miniTn5  
90 (mTn5) transposons and cloned the hyperactive transposase gene downstream of a *lac*  
91 promoter. We show that the resulting constructs can be used for efficient insertional  
92 mutagenesis in three different bacterial species. In *Pseudomonas aeruginosa* PAO1, we  
93 show that our system is able to generate a Tn5 insertion library that is almost 2 logs larger  
94 than the best library of PAO1 and related *Pseudomonas* strains previously reported,  
95 demonstrating that we have developed a powerful mutagenesis tool that is highly useful  
96 for microbiology studies.

97

## 98 **Results**

## 99 **Construction of IPTG-controlled suicide plasmids**

100 To develop a method for efficient transposon mutagenesis in bacterial species that are  
101 difficult to transform and conjugate, we created multiple IPTG-controlled suicide plasmids  
102 that have a broad host range (Fig. 1a). The plasmids were derived from pMMB208, which  
103 is a conjugatable plasmid containing an RSF1010 *oriV* (an IncQ-type origin of replication)  
104 that can replicate in most Gram-negative bacteria and a few Gram-positive bacteria [18].  
105 Plasmid replication requires three proteins, RepA, MobA/RepB and RepC, which are a  
106 helicase, a primase and an *oriV*-binding protein, respectively. *repF* encodes a small  
107 repressor protein that binds the P4 promoter and controls the *repF-repA-repC* operon  
108 through feedback inhibition [19, 20]. pMMB208 also contains a *tac* promoter (*P<sub>tac</sub>*), a  
109 *lacI<sup>Q</sup>* gene and a chloramphenicol resistance marker (*Cam<sup>R</sup>*). To create a conditional  
110 suicide plasmid (pMMB-*repF*), a second copy of the *repF* gene was inserted downstream  
111 of *P<sub>tac</sub>*. Upon IPTG induction, efficient plasmid loss from transformed *E. coli* DH10B cells  
112 was observed (99.97%; Fig. 1b). As an alternative strategy, we inserted two *repA* helicase  
113 dominant negative mutants, K42A and D139A, downstream of *P<sub>tac</sub>* [21]. Similarly, IPTG  
114 was able to induce efficient plasmid loss from the transformed DH10B cells. In fact,  
115 plasmid retention rates of the dominant negative mutants (K42A,  $4.9 \times 10^{-7}$ ; D139A,  $1.5$   
116  $\times 10^{-5}$ ) were much lower than that of pMMB-*repF* ( $3.5 \times 10^{-4}$ ) (Fig. 1b). However, the two  
117 *repA* dominant negative mutants showed significantly lower plasmid stability in the  
118 absence of IPTG induction (Fig. 1b), suggesting that plasmid replication is strongly  
119 inhibited by leaky expression of the dominant negative mutants, or by spontaneous  
120 recombination of the wild-type and the dominant negative *repA* genes (~861 bp direct  
121 repeats). Consistent with that, there were ~20-30-fold less plasmid isolated from the same

122 amount of cells for the two mutant constructs (Fig. 1c). Therefore, we decided to choose  
123 pMMB-*repF* for further experiments. To kill the cells that still retain the plasmid after IPTG  
124 induction, we inserted a *sacB* counter selection marker into the vector [22], resulting in  
125 pMMB-*repF/sacB*. Indeed, insertion of *sacB* allows efficient killing of plasmid-containing  
126 cells by sucrose (data not shown; also see below).

127

### 128 **IPTG-controlled mutagenesis of *E. coli* by a highly-active mTn5 transposon**

129 A *Kan<sup>R</sup>*-tagged mTn5 was then inserted in pMMB-*repF/sacB* for transposon mutagenesis  
130 (Fig. 2a) [4]. The mTn5 contains an OE and an IE at the termini. In addition, it contains  
131 an uncoupled, *lac* promoter (*P<sub>lac</sub>*)-controlled *tnp<sup>H</sup>* gene encoding the hyperactive  
132 transposase (Tnp<sup>H</sup>) [3], thus allowing inducible expression of Tnp<sup>H</sup>. *E. coli* cells  
133 transformed with this plasmid, pSNC-mTn5, were cultured in LB media with and without  
134 IPTG induction for 24 h. Cells were then analyzed for efficiencies of plasmid loss, sucrose  
135 counter selection and transposon insertion (See Materials and Methods). The plasmid is  
136 stable without IPTG induction, as ~91.4% of cells retained the plasmid (Cam<sup>R</sup>) after 24 h  
137 culture in the absence of antibiotics (Fig. 2b). In contrast, ~2.6 x 10<sup>-3</sup> of the cells retained  
138 the plasmid post IPTG induction, suggesting that overexpression of the RepF repressor  
139 caused efficient plasmid loss. Sucrose counter selection further reduced plasmid-bearing  
140 cells (~1.6 x 10<sup>-6</sup> are Cam<sup>R</sup>; ~1600-fold reduction). In comparison, the percentage of  
141 Suc<sup>R</sup>Kan<sup>R</sup> cells after IPTG induction was found to be ~2.3 x 10<sup>-4</sup> (Tn5-containing),  
142 significantly higher than that of Suc<sup>R</sup>Cam<sup>R</sup> cells (~1.6 x 10<sup>-6</sup>, plasmid-containing),  
143 suggesting that Tn5 transposition had occurred efficiently (Suc<sup>R</sup>Kan<sup>R</sup>Cam<sup>S</sup>: ~2.3 x 10<sup>-4</sup>).  
144 Colony restreaking showed that 150/150 Suc<sup>R</sup>Kan<sup>R</sup> colonies were Kan<sup>R</sup>Cam<sup>S</sup> (Fig. 2c).

145 Colony PCRs, which used two sets of primers (P1+P2 for detection of *Kan<sup>R</sup>*, or mTn5,  
146 and P3+P4 for detection of *tac-repF*, or plasmid), confirmed plasmid loss in 10 out of 10  
147 colonies (10/10) (Fig. 2d). Sequence analysis showed that all 13 Suc<sup>R</sup>Kan<sup>R</sup> colonies  
148 analyzed had different Tn5 insertion sites (Fig. 3a).

149

### 150 **Efficient mutagenesis of *Acinetobacter baylyi* and *P. aeruginosa* by a highly-active** 151 **mTn5 transposon**

152 Construct pSNC-mTn5 was then tested in two Gram-negative, capsule-bearing bacteria,  
153 *A. baylyi* 33305 and *P. aeruginosa* PAO1 [23, 24]. Comparing to *E. coli* DH10B,  
154 transformed *A. baylyi* 33305 and *P. aeruginosa* PAO1 appeared to lose the plasmid more  
155 easily in the absence of IPTG, with ~56.3% of *A. baylyi* and ~59.6% of *P. aeruginosa*  
156 retaining the plasmid after 24 h culture in LB media without antibiotics (Fig. 2e, f).  
157 Following IPTG induction, ~14.7% of *A. baylyi* and ~3.2% of *P. aeruginosa* retained the  
158 plasmid, suggesting that IPTG induced additional plasmid loss from these organisms,  
159 although their efficiencies were lower than that in DH10B cells. With sucrose counter  
160 selection,  $\sim 1.6 \times 10^{-7}$  of *A. baylyi* remained Cam<sup>R</sup>, indicating that they contained the  
161 plasmid (Fig. 2e). Similarly,  $\sim 5.4 \times 10^{-7}$  of *P. aeruginosa* cells were found to be Suc<sup>R</sup>Cam<sup>R</sup>  
162 (Fig. 2f). These results suggest that IPTG and sucrose both contributed in reducing  
163 plasmid-bearing cells. In comparison, the percentages of Suc<sup>R</sup>Kan<sup>R</sup> cells were  $8.4 \times 10^{-6}$   
164 for *A. baylyi* and  $3.4 \times 10^{-6}$  for *P. aeruginosa*, suggesting that Tn5 transposition occurred  
165 in both organisms prior to plasmid loss. Colony restreaking showed that 100/100  
166 Suc<sup>R</sup>Kan<sup>R</sup> colonies are Suc<sup>R</sup>Cam<sup>S</sup>, suggesting that efficient plasmid loss had occurred  
167 following Tn5 transposition (~100% for both; Additional file 1: Figure S2a, c). Loss of



168 plasmids was further confirmed by PCR tests (Additional file 1: Figure S2b, d). As  
169 observed in DH10B cells, Tn5 insertion also seemed to be random, as 9/9 *A. baylyi* and  
170 13/15 *P. aeruginosa* mutants had different Tn5 insertion sites (Fig. 3b, c). The detection  
171 of identical mutants suggests that cell growth ensued following transposon transposition  
172 (Fig. 3c), which is common in different transposon mutagenesis assays [5, 6, 25].

173

### 174 **Construction of a Tn5 insertion library of *P. aeruginosa* using the highly-active** 175 **mTn5 transposon**

176 To determine whether we can construct a transposon insertion library of *P. aeruginosa*  
177 PAO1 with high diversity, ten pSNC-mTn5 transformants of the bacterium were cultured  
178 independently and then combined and induced with IPTG to initiate transposon  
179 mutagenesis. Following 24 h culture in LB media containing IPTG, ~6.4% of cells retained  
180 the plasmid (Additional file 1: Figure S3a). The frequencies of Suc<sup>R</sup>Cam<sup>R</sup> and Suc<sup>R</sup>Kan<sup>R</sup>  
181 cells in the IPTG-induced culture were found to be  $\sim 6.5 \times 10^{-7}$  and  $\sim 3.5 \times 10^{-6}$ ,  
182 respectively. Based on the total number of cells cultured and the frequency of  
183 Suc<sup>R</sup>Kan<sup>R</sup>Cam<sup>S</sup> cells, the total diversity of the mTn5 insertion library was estimated to be  
184  $\sim 1.3 \times 10^7$ , which covers the entire gene repertoire (5697) of *P. aeruginosa* PAO1 by  
185  $\sim 2,238$  times [24]. To our knowledge, the diversity of this transposon insertion library is  
186 bigger than the best transposon insertion library of PAO1 and related strains previously  
187 reported (Table 1) [5, 6, 9, 26-32]. Colony restreaking and PCR tests confirmed plasmid  
188 loss in the mutants (Additional file 1: Figure S3b, c), and 28/37 clones analyzed had  
189 different Tn5 insertion sites (Additional file 1: Figure S3d). Based on the percentage of  
190 independent clones in the library, its diversity is re-estimated to be  $\sim 1.0 \times 10^7$ .

191 **Table 1** Comparison of transposon insertion libraries of *P. aeruginosa* strains

| <i>Pseudomonas</i> strains               | Total mutants           | Transposon | Method       | References |
|------------------------------------------|-------------------------|------------|--------------|------------|
| <i>P. aeruginosa</i> PAO1                | ~ <b>75,000,000</b>     | mTn5ME     | IPTG-curable | This study |
| <i>P. aeruginosa</i> PAO1                | ~ <b>10,000,000</b>     | mTn5       | IPTG-curable | This study |
| <i>P. aeruginosa</i> PAO1                | ~80,000                 | Himar1     | Conjugation  | [26]       |
| <i>P. aeruginosa</i> PAO1                | ~18,500                 | Tn5        | Conjugation  | [27]       |
| <i>P. aeruginosa</i> MPAO1 <sup>a</sup>  | ~2,172,750 <sup>c</sup> | Tn5        | Conjugation  | [6]        |
| <i>P. aeruginosa</i> MPAO1               | ~100,000                | Tn5        | Conjugation  | [28]       |
| <i>P. aeruginosa</i> MPAO1               | ~45,409                 | Tn5        | Conjugation  | [5]        |
| <i>P. aeruginosa</i> PAO1SR <sup>b</sup> | ~1,000,000              | Himar1     | Conjugation  | [29]       |
| <i>P. aeruginosa</i> PA14                | ~300,000 <sup>d</sup>   | Himar1     | Conjugation  | [30]       |
| <i>P. aeruginosa</i> PA14                | ~38,976                 | Himar1     | Conjugation  | [31]       |
| <i>P. aeruginosa</i> QR1                 | ~15,000                 | Himar1     | Conjugation  | [32]       |

192 <sup>a</sup> A PAO1 derivative with ~0.2% genetic changes

193 <sup>b</sup> A streptomycin resistant derivative of PAO1 with unknown changes

194 <sup>c</sup> Combination of 16 experiments

195 <sup>d</sup> Combination of 100 independent conjugations

196

197 **An mTn5 with MEs enables generation of a *P. aeruginosa* mutant library with even**  
198 **higher diversity**

199 To determine whether the efficiency of mTn5 transposition can be further improved, we  
200 replaced both OE and IE of the mTn5 with MEs (Fig. 4a). The new plasmid, pSNC-  
201 mTn5ME, was transformed into DH10B cells. Cell growth (or colony sizes) appeared to  
202 be normal, suggesting that basal-level transposition, if any, did not lead to obvious cellular  
203 toxicity, which was our initial concern. The behavior of the plasmid and Tn5 transposition  
204 efficiency were determined under the same conditions described above. Without IPTG  
205 induction, the plasmid remained relatively stable, as ~100% of the cells retained the  
206 plasmid (Cam<sup>R</sup>). After IPTG induction for 24 h,  $1.1 \times 10^{-3}$  of the cells retained the plasmid,  
207 suggesting that RepF overexpression caused efficient plasmid loss. With sucrose counter  
208 selection,  $\sim 2.4 \times 10^{-5}$  cells remained Suc<sup>R</sup>Cam<sup>R</sup>. Interestingly, the frequency of Suc<sup>R</sup>Kan<sup>R</sup>  
209 cells was found to be very high (~28.0%), indicating that mTn5ME is much more active

210 than the non-ME version (~1200 folds). Restreaking of Suc<sup>R</sup>Kan<sup>R</sup> colonies showed that  
211 they were all Kan<sup>R</sup>Cam<sup>S</sup> (100/100) (Additional file 1: Figure S4a), and colony PCRs  
212 confirmed plasmid loss (10/10) (Additional file 1: Figure S4b). Sequence analysis of the  
213 transposon insertion junctions showed that all 13 Suc<sup>R</sup>Kan<sup>R</sup> colonies analyzed had  
214 different Tn5 integration sites (Additional file 1: Figure S4c).

215 We then determined whether construct pSNC-mTn5ME would also be more active  
216 in *A. baylyi* 33305 and in *P. aeruginosa* PAO1. For *A. baylyi*, the efficiencies of plasmid  
217 loss were higher for pSNC-mTn5ME than for pSNC-mTn5, both in the absence and  
218 presence of IPTG induction (Fig. 2e and 4c). Sucrose counter selection was highly  
219 effective for both constructs (Fig. 2e and 4c). As in *E. coli*, mTn5ME was found to be  
220 much more active than the non-ME version (~140 fold higher; Suc<sup>R</sup>Kan<sup>R</sup> cells:  $\sim 1.2 \times 10^{-3}$   
221 for mTn5ME vs.  $\sim 8.4 \times 10^{-6}$  for mTn5). Similarly, colony restreaking of Suc<sup>R</sup>Kan<sup>R</sup> cells  
222 showed that 100/100 colonies are Kan<sup>R</sup>Cam<sup>S</sup> (Additional file 1: Figure S5a), and plasmid  
223 loss was further verified by PCR (Additional file 1: Figure S5b). 9/14 colonies were found  
224 to have different Tn5 insertion sites (Additional file 1: Figure S5c). For PAO1, efficiencies  
225 of plasmid loss ( $\pm$ IPTG) were found to be similar for both pSNC-mTn5 and pSNC-  
226 mTn5ME (Fig. 2f and 4d), and sucrose counter selection was also effective for pSNC-  
227 mTn5ME (Fig. 4d). As in *E. coli* and in *A. baylyi*, mTn5ME was found to be more active  
228 than mTn5 in PAO1 (~11 fold higher; Suc<sup>R</sup>Kan<sup>R</sup> cells:  $\sim 3.9 \times 10^{-5}$  for mTn5ME vs.  $\sim 3.4 \times$   
229  $10^{-6}$  for mTn5) (Fig. 2f and 4d). In the colony restreaking assay, 100/100 Suc<sup>R</sup>Kan<sup>R</sup>  
230 colonies were found to be Kan<sup>R</sup>Cam<sup>S</sup> (Additional file 1: Figure S6a), and PCR assays  
231 further confirmed plasmid loss (10/10) (Additional file 1: Figure S6b). Sequence

232 determination showed that 7/10 colonies tested had different Tn5 insertion sites  
233 (Additional file 1: Figure S6c).

234 We then determined whether pSNC-mTn5ME would be a better construct than  
235 pSNC-mTn5 for transposon saturation mutagenesis in *P. aeruginosa*. Ten transformants  
236 were randomly picked for Tn5 insertion library construction using the protocol described  
237 above. About 0.87% of cells retained the plasmid after IPTG induction, and the frequency  
238 of Suc<sup>R</sup>Cam<sup>R</sup> cells was found to be  $6.8 \times 10^{-8}$ . In comparison, the frequency of Suc<sup>R</sup>Kan<sup>R</sup>  
239 cells was found to be  $\sim 9.5 \times 10^{-5}$ , suggesting that efficient mTn5ME transposition has  
240 occurred. Based on the total amount of cells cultured and the mTn5ME transposition  
241 efficiency ( $\sim 9.5 \times 10^{-5}$ ), the diversity of the mTn5ME insertion library was estimated to be  
242  $1.02 \times 10^8$ , which is  $\sim 3$  logs larger than the best PAO1 transposon insertion library  
243 previously reported and  $\sim 2$  logs larger than a Tn5 insertion library of *P. aeruginosa*  
244 MPAO1, a derivative of PAO1 with  $\sim 0.2\%$  genetic variation [6, 33]. This new library is by  
245 far the biggest transposon insertion library of PAO1 and related species ever reported  
246 (Table 1). The size of our new library is enough to cover the entire gene repertoire of  
247 PAO1 by  $\sim 18,000$  times. Colony restreaking (100) and PCR tests (10) confirmed plasmid  
248 loss in all the Suc<sup>R</sup>Kan<sup>R</sup> clones analyzed (Fig. 4f, g), and 34/46 clones tested had different  
249 Tn5 insertion sites (Fig. 4h). Thus, the independent clones in the library (library diversity)  
250 are estimated to be  $\sim 7.5 \times 10^7$ .

251

## 252 Discussion

253 We have developed a new transposon mutagenesis system that is efficient, regulatable,  
254 easy-to-use, and broadly useful. We believe it will be especially useful for functional

255 genomics studies of Gram-negative bacteria that are difficult to transform and conjugate,  
256 such as certain capsule-containing bacteria, obligate anaerobes, and possibly obligate  
257 intracellular pathogens as well. The advantage of this method relies on the following  
258 features: (i) A broadly-functional plasmid replicon; (ii) Replication of the plasmid is  
259 regulated by IPTG; (iii) The inclusion of the *sacB* gene for counter selection; (iv) A highly-  
260 active/hyperactive transposon; (v) Regulatable expression of the hyperactive  
261 transposase gene; (vi) mTn5 and mTn5ME transposons insert almost completely  
262 randomly in different bacteria (Additional file 1: Figure S7) [34, 35]. In addition, the  
263 relatively small sizes of the RSF1010-based plasmids also facilitate their transformation  
264 and conjugation. Similar to transposon mutagenesis using *ts* plasmids, our system does  
265 not depend on efficient plasmid transformation and conjugation, and requires as few as  
266 one transformant or conjugated cell for transposon saturation mutagenesis. Using this  
267 new tool, we have generated a Tn5 transposon insertion library of *P. aeruginosa* PAO1  
268 with a diversity of  $\sim 10^8$ , which is  $\sim 2$  logs larger than the best transposon insertion library  
269 of PAO1 and related *Pseudomonas* strains ever generated (Table 1). *P. aeruginosa* is an  
270 important opportunistic pathogen that frequently causes nosocomial infections and many  
271 of the strains are multidrug-resistant. The mutant PAO1 library we generated should also  
272 be valuable for *P. aeruginosa* pathogenesis studies.

273 To our knowledge, our plasmids are the only non-*ts*, conditional suicide plasmids  
274 used for transposon mutagenesis, and they replicate in a wide range of bacterial species  
275 [19]. In contrast, many *ts* mutant plasmids seem to have limited host ranges, either due  
276 to the limited host ranges of the parental plasmids, or due to the species-specificity of  
277 their *ts* phenotypes [10, 11, 14-17, 36]. In addition, *ts* plasmids often require prolonged

278 incubation at high temperatures for plasmid curing, which can be harsh conditions for  
279 bacterial growth and survival, thus may lead to accumulation of adaptive genetic changes.  
280 Table S1 in Additional file 1 is a detailed comparison of our systems (pSNC-mTn5 and  
281 pSNC-mTn5ME) with various *ts* plasmid-based platforms that have been used for  
282 transposon mutagenesis in Gram-negative bacterial species, which clearly shows that  
283 our systems will be more broadly useful. In addition to their utilities in transposon  
284 mutagenesis, the IPTG-controlled conditional suicide plasmids that we developed should  
285 have many other applications, such as for allelic exchange or as curable vectors for  
286 delivering gene targeting systems, *e.g.*, TargeTrons,  $\lambda$  Red, RecET, *etc* [37, 38].

287

## 288 **Conclusion**

289 In this work, we have developed a number of IPTG-controlled conditional suicide plasmids  
290 that contain the broad-host-range RSF1010 origin. Using one of the constructs to deliver  
291 a hyperactive mTn5 transposon, we showed that this system can be used for efficient  
292 mutagenesis of different bacterial species. As the assay condition is mild and the host  
293 range of the RSF1010 plasmid is extremely wide, we believe that our methodology will  
294 have broad applications in microbiology research.

295

## 296 **Methods**

### 297 **Bacterial strains and growth conditions**

298 *E. coli* DH10B was purchased from Invitrogen. *A. baylyi* (ATCC 33305) and *P. aeruginosa*  
299 PAO1 (ATCC BAA-47) were purchased from ATCC. Unless stated otherwise, all the  
300 strains were grown at 37°C in Luria Broth (LB) liquid media with agitation at 200 rpm or

301 on LB plates with 1.5% agar. For *sacB* counter selection, we used LBNS plates (LB no  
302 salt: 1% Tryptone, 0.5% yeast extract and 1.5% agar) supplemented with 10% sucrose  
303 (Fisher Scientific). Appropriate antibiotics and concentrations were used to select for  
304 bacterial cells that are antibiotic resistant. *E. coli* DH10B: chloramphenicol (Cam; Gold  
305 Biotechnology), 25 µg/ml; kanamycin (Kan; Fisher Scientific), 50 µg/ml. *A. baylyi*: Cam,  
306 10 µg/ml; Kan, 10 µg/ml. *P. aeruginosa* PAO1: Cam, 250 µg/ml; Kan, 500 µg/ml.

307

### 308 **Plasmid construction**

309 To construct plasmid pMMB-*repF*, we PCR-amplified the *repF* gene from pMMB208 [18].  
310 The PCR fragment was digested with *HindIII* and *PstI*, and inserted at the corresponding  
311 sites of pMMB208, downstream of the *tac* promoter (*P<sub>tac</sub>*). To construct plasmid pMMB-  
312 *repF/sacB*, the *sacB* gene and its promoter were PCR amplified from plasmid pRE112  
313 [22] and inserted between the unique *SacI* and *KpnI* sites of pMMB-*repF*.

314 To construct plasmids pMMB-*repAK42A* and pMMB-*repAD139A*, *repA* genes  
315 containing K42A and D139A mutations were generated in two-step PCRs from plasmid  
316 pMMB208 [21]. The mutant genes were cloned between the *HindIII* and *PstI* sites of  
317 pMMB208.

318 Plasmid pSNC-mTn5 was constructed in multiple steps. First, plasmid pUT-  
319 mTn5Km/lacEZ was constructed from plasmid pUT-mTn5Km [4]. It contains a *lac*  
320 promoter-driven hyperactive transposase gene (*tnp<sup>H</sup>*) that has E54K, M56A and L372P  
321 mutations [3]. In addition, inside the mTn5 transposon, the inverted repeats flanking the  
322 kanamycin resistance marker (*Kan<sup>R</sup>*) were deleted [4]. The entire mTn5 cassette of pUT-  
323 mTn5Km/lacEZ, which contains the *Kan<sup>R</sup>*-mTn5 transposon and *P<sub>lac</sub>-tnp<sup>H</sup>*, was then PCR

324 amplified and cloned at the *Xba*I site of pMMB-*repF/sacB*, resulting in plasmid pSNC-  
325 mTn5. It has an OE and an IE at the termini of the mTn5. Plasmid pSNC-mTn5ME was  
326 derived from pSNC-mTn5 by replacing both OE and IE with MEs.

327

### 328 **Characterization of IPTG-induced plasmid loss and Transposon mutagenesis**

329 To test IPTG-induced plasmid loss of pMMB-*repF*, pMMB-*repAK42A* and pMMB-  
330 *repAD139A*, single colonies of *E. coli* DH10B cells transformed with the plasmids were  
331 inoculated into 5 ml LB+Cam media and cultured at 37°C for ~14 hours (h). After  
332 measuring OD<sub>600</sub>, 1 ml of each culture was pelleted by centrifugation and washed with  
333 500 µl of fresh LB to remove antibiotics. Cells were then resuspended in 1 ml LB. An  
334 aliquot was added to 5 ml LB (final OD<sub>600</sub> = 0.001) with and without 1 mM IPTG and  
335 cultured at 37°C for 24 h. 1 ml of the IPTG-induced samples was then pelleted, washed  
336 with 500 µl LB, and resuspended in 1 ml LB. Serial dilutions of the samples (±IPTG) were  
337 plated on LB and LB+Cam plates to evaluate plasmid loss. Plasmid retention frequencies  
338 were calculated as ratios of cfu (colony forming units) on LB+Cam plates and those on  
339 LB plates.

340 To perform transposon mutagenesis in *E. coli* DH10B, single colonies of pSNC-  
341 mTn5 and pSNC-mTn5ME transformants were cultured in 5 ml LB+Cam+Kan media  
342 overnight at 37°C. Cells were then pelleted and washed as above to remove antibiotics,  
343 and an aliquot was inoculated to 5 ml LB (final OD<sub>600</sub> = 0.001) in a 14 ml culture tube and  
344 grown at 37°C for 24 h with and without 1 mM IPTG induction. A 1 ml aliquot of the IPTG-  
345 induced samples was then pelleted, washed with 500 µl LBNS, and resuspended in 1 ml  
346 LBNS. Serial dilutions of the samples (±IPTG) were plated on LB and LB+Cam plates to



347 evaluate plasmid loss. The IPTG induced samples were also plated on LBNS+10%  
348 sucrose and LBNS+10% sucrose+Cam plates to estimate percentage of plasmid-  
349 retaining cells in the presence of sucrose counter selection; and LBNS+10%  
350 sucrose+Kan plates to select for transposition events. Plasmid retention frequencies  
351 (PRF) were calculated as the following: (1) -IPTG: (cfu on LB+Cam)/(cfu on LB); (2)  
352 +IPTG: (cfu on LB+Cam)/(cfu on LB); (3) +IPTG+Suc: (cfu on LBNS+Suc+Cam)/(cfu on  
353 LBNS+Suc). Transposon retention frequencies (TRF) were calculated as the following:  
354 +IPTG+Suc: (cfu on LBNS+Suc+Kan)/(cfu on LBNS+Suc). mTn5 (or mTn5ME)  
355 transposition frequencies were calculated as  $TRF_{+IPTG+Suc} - PRF_{+IPTG+Suc}$ , which  
356 essentially equals to  $TRF_{+IPTG+Suc}$  if the background ( $PRF_{+IPTG+Suc}$ ) is low. The same  
357 protocol, except for the concentrations of antibiotics (indicated above) and IPTG (10 mM  
358 for PAO1), was followed to perform transposon mutagenesis in *P. aeruginosa* PAO1.

359 Similarly, to perform transposon mutagenesis in *A. baylyi* 33305, single colonies  
360 of pSNC-mTn5 and pSNC-mTn5ME transformants were cultured in 5 ml LB+Cam+Kan  
361 media overnight at 37°C. Cells were pelleted and washed as for *E. coli* and *P. aeruginosa*.  
362 Then, an aliquot was inoculated to 100 ml LB (final OD<sub>600</sub> = 0.001) in a baffled flask. The  
363 cultures were shaken vigorously (~250 rpm) at 37°C for 24 h with and without 10 mM  
364 IPTG induction. A 1 ml aliquot of the IPTG-induced samples was then pelleted, washed  
365 with 500 µl LBNS, and resuspended in 1 ml LBNS. Serial dilutions of the samples (±IPTG)  
366 were then plated on appropriate plates to evaluate plasmid loss and mTn5 (or mTn5ME)  
367 transposition as in the assays for *E. coli* and for *P. aeruginosa*.

368 To verify plasmid loss in cells with potential transposition events, 100-150  
369 Suc<sup>R</sup>Kan<sup>R</sup> colonies in each assay were then restreaked on LB+Kan and LB+Cam plates.

370 In addition, presence of the transposon and the plasmid was determined by colony PCRs  
371 in a 25  $\mu$ l reaction containing 25 mM TAPS-HCl (pH 9.3), 50 mM KCl, 2 mM MgCl<sub>2</sub>, 1 mM  
372  $\beta$ -mercaptoethanol, 1x GC enhancer, 0.2 mM dNTPs, 0.1  $\mu$ l of Q5 polymerase (2 u/ $\mu$ l;  
373 NEB), 1  $\mu$ l of resuspended cells, and 150 ng each of the primers (final concentration =  
374 ~0.5  $\mu$ M; see figure legends and Table S2 in Additional file 1 for oligos used). PCRs were  
375 performed using the following condition: 1x (94°C, 2 minutes); 25x (94°C, 30 seconds;  
376 50°C, 30 seconds; 72°C, 1 minute); 1x (72°C, 10 minutes); 1x (4°C, hold).

377

### 378 **Determination of transposon insertion sites**

379 Transposon insertion sites in bacterial chromosomes were determined by arbitrarily  
380 primed PCR, in which transposon junctions were amplified in two steps [5, 39]. Bacterial  
381 cells were resuspended in 10-20  $\mu$ l of deionized water and 1  $\mu$ l was used directly as the  
382 PCR template. In the first PCR step, the reaction was performed using a specific primer  
383 annealing to the transposon region (Tn5Km1) and a semi-degenerate primer (BDC1) that  
384 anneals to many sites on the bacterial chromosome. In the second step, aliquots of the  
385 first-round PCR products were amplified using a primer annealing to the transposon  
386 region (Tn5Km2), slightly closer to the insertion junction, and a non-degenerate primer  
387 (BDC2) that anneals to the constant region of the BDC1-derived sequence. PCRs were  
388 carried out under the conditions described above. PCR products from Step 2 were  
389 resolved in a 2% agarose gel and major products were gel-purified for sequencing to  
390 determine Tn5 insertion sites.

391

### 392 **Construction of transposon insertion libraries of *P. aeruginosa* PAO1**

393 To construct an mTn5 (or mTn5ME) insertion library of *P. aeruginosa* PAO1, plasmid  
394 pSNC-mTn5 (or pSNC-mTn5ME) was first electroporated into the bacterial cells. Ten  
395 transformants were cultured independently in 5 ml LB+Cam+Kan media at 37°C for ~14  
396 hours. Equal amount of each sample (equivalent to 0.5 OD<sub>600</sub> x 1 ml) was then combined,  
397 pelleted, washed with 500 µl LB, and the pellet was resuspended in 1 ml LB. An aliquot  
398 of the mixture was then inoculated into 500 ml LB supplemented with 10 mM IPTG in a  
399 baffled flask (final OD<sub>600</sub> = 0.01) and shaken vigorously (300 rpm) at 37°C for 24 h to  
400 perform transposon mutagenesis. The cells were then pelleted by centrifugation and  
401 washed with 250 ml LBNS medium. The pellet was resuspended in 50 ml LBNS medium  
402 and serial dilutions were plated on LB, LB+Cam, LBNS+10% sucrose, LBNS+10%  
403 sucrose+Cam, and LBNS+10% sucrose+Kan plates to determine plasmid loss, mTn5  
404 (mTn5ME) transposition, and total library diversity. Arbitrary PCR and DNA sequencing  
405 were then performed to determine Tn5 insertion sites.

406

#### 407 **Determination of mTn5 and mTn5ME target site preferences in *P. aeruginosa* PAO1**

408 To determine if mTn5 and mTn5ME have any target site preferences in *P. aeruginosa*  
409 PAO1, we generated sequence logos of their insertion sites in the bacterium using the  
410 WebLogo server (<https://weblogo.berkeley.edu/logo.cgi>). In total, 40 mTn5 insertion sites  
411 and 41 mTn5ME insertion sites were used for the analysis.

412

#### 413 **Abbreviations**

414 IPTG: Isopropyl  $\beta$ -D-1-thiogalactopyranoside; *ts*: Temperature-Sensitive; bp: base pair;  
415 OE: Outside End; IE: Inside End; ME: Mosaic End; OD: Optical Density; LB: Luria Broth;  
416 LBNS: LB no salt; Cam: Chloramphenicol; Kan: kanamycin.

417

#### 418 **Acknowledgements**

419 We thank Drs. Mark McIntosh, David Pintel and Donald H. Burke for helpful discussions.

420

#### 421 **Funding**

422 This work was supported by the University of Missouri startup fund to H.G.

423

#### 424 **Availability of data and materials**

425 The dataset supporting the conclusion of this article are available from the  
426 corresponding author on reasonable request.

427

#### 428 **Authors' contributions**

429 SSN, HG conceived the study and designed the experiments; SSN, JH, SYZ, JZ, AS,

430 LBG, CVS, FR, performed the experiments; SSN and HG, wrote the manuscript. All

431 authors have read and approved the manuscript.

432

#### 433 **Ethics approval and consent to participate**

434 Not applicable.

435

#### 436 **Consent for publication**

437 Not applicable.

438

439 **Competing interests**

440 The authors declare no competing financial interests.

441

442 **References**

443

- 444 1. Phadnis SH, Berg DE: Identification of base pairs in the outside end of insertion  
445 sequence IS50 that are needed for IS50 and Tn5 transposition. Proc Natl Acad Sci U  
446 S A. 1987;84(24):9118-9122.
- 447 2. Reznikoff WS: Transposon Tn5. Annu Rev Genet. 2008;42:269-286.
- 448 3. Goryshin IY, Reznikoff WS: Tn5 in vitro transposition. J Biol Chem.  
449 1998;273(13):7367-7374.
- 450 4. de Lorenzo V, Herrero M, Jakubzik U, Timmis KN: Mini-Tn5 transposon derivatives  
451 for insertion mutagenesis, promoter probing, and chromosomal insertion of cloned  
452 DNA in gram-negative eubacteria. J Bacteriol. 1990;172(11):6568-6572.
- 453 5. Jacobs MA, Alwood A, Thaipisuttikul I, Spencer D, Haugen E, Ernst S, Will O, Kaul  
454 R, Raymond C, Levy R *et al*: Comprehensive transposon mutant library of  
455 *Pseudomonas aeruginosa*. Proc Natl Acad Sci U S A. 2003;100(24):14339-14344.
- 456 6. Lee SA, Gallagher LA, Thongdee M, Staudinger BJ, Lippman S, Singh PK, Manoil C:  
457 General and condition-specific essential functions of *Pseudomonas aeruginosa*. Proc  
458 Natl Acad Sci U S A. 2015;112(16):5189-5194.

- 459 7. Metzger M, Bellemann P, Schwartz T, Geider K: Site-directed and transposon-  
460 mediated mutagenesis with pfd-plasmids by electroporation of *Erwinia amylovora* and  
461 *Escherichia coli* cells. *Nucleic Acids Res.* 1992;20(9):2265-2270.
- 462 8. Leahy JG, Jonesmeehan JM, Colwell RR: Transformation of *Acinetobacter*-  
463 *Calcoaceticus* Rag-1 by Electroporation. *Can J Microbiol.* 1994;40(3):233-236.
- 464 9. Shan Z, Xu H, Shi X, Yu Y, Yao H, Zhang X, Bai Y, Gao C, Saris PE, Qiao M:  
465 Identification of two new genes involved in twitching motility in *Pseudomonas*  
466 *aeruginosa*. *Microbiology.* 2004;150(Pt 8):2653-2661.
- 467 10. Sasakawa C, Yoshikawa M: A series of Tn5 variants with various drug-resistance  
468 markers and suicide vector for transposon mutagenesis. *Gene.* 1987;56(2-3):283-  
469 288.
- 470 11. Harayama S, Tsuda M, Iino T: Tn1 insertion mutagenesis in *Escherichia coli* K-12  
471 using a temperature-sensitive mutant of plasmid RP4. *Mol Gen Genet.*  
472 1981;184(1):52-55.
- 473 12. Le Breton Y, Mohapatra NP, Haldenwang WG: In vivo random mutagenesis of  
474 *Bacillus subtilis* by use of TnYLB-1, a mariner-based transposon. *Appl Environ*  
475 *Microbiol.* 2006;72(1):327-333.
- 476 13. Stubbendieck RM, Straight PD: Linearmycins Activate a Two-Component Signaling  
477 System Involved in Bacterial Competition and Biofilm Morphology. *J Bacteriol.*  
478 2017;199(18).
- 479 14. Maier TM, Pechous R, Casey M, Zahrt TC, Frank DW: In vivo Himar1-based  
480 transposon mutagenesis of *Francisella tularensis*. *Appl Environ Microbiol.*  
481 2006;72(3):1878-1885.

- 482 15. Rholl DA, Trunck LA, Schweizer HP: In vivo Himar1 transposon mutagenesis of  
483 Burkholderia pseudomallei. Appl Environ Microbiol. 2008;74(24):7529-7535.
- 484 16. Pelicic V, Jackson M, Reyrat JM, Jacobs WR, Jr., Gicquel B, Guilhot C: Efficient allelic  
485 exchange and transposon mutagenesis in Mycobacterium tuberculosis. Proc Natl  
486 Acad Sci U S A. 1997;94(20):10955-10960.
- 487 17. Choi KH, Mima T, Casart Y, Rholl D, Kumar A, Beacham IR, Schweizer HP: Genetic  
488 tools for select-agent-compliant manipulation of Burkholderia pseudomallei. Appl  
489 Environ Microbiol. 2008;74(4):1064-1075.
- 490 18. Morales VM, Backman A, Bagdasarian M: A series of wide-host-range low-copy-  
491 number vectors that allow direct screening for recombinants. Gene. 1991;97(1):39-  
492 47.
- 493 19. Meyer R: Replication and conjugative mobilization of broad host-range IncQ  
494 plasmids. Plasmid. 2009;62(2):57-70.
- 495 20. Maeser S, Scholz P, Otto S, Scherzinger E: Gene F of plasmid RSF1010 codes for a  
496 low-molecular-weight repressor protein that autoregulates expression of the repAC  
497 operon. Nucleic Acids Res. 1990;18(21):6215-6222.
- 498 21. Ziegelin G, Niedenzu T, Lurz R, Saenger W, Lanka E: Hexameric RSF1010 helicase  
499 RepA: the structural and functional importance of single amino acid residues. Nucleic  
500 Acids Res. 2003;31(20):5917-5929.
- 501 22. Edwards RA, Keller LH, Schifferli DM: Improved allelic exchange vectors and their  
502 use to analyze 987P fimbria gene expression. Gene. 1998;207(2):149-157.
- 503 23. Barbe V, Vallenet D, Fonknechten N, Kreimeyer A, Oztas S, Labarre L, Cruveiller S,  
504 Robert C, Duprat S, Wincker P *et al*: Unique features revealed by the genome

- 505 sequence of *Acinetobacter* sp. ADP1, a versatile and naturally transformation  
506 competent bacterium. *Nucleic Acids Res.* 2004;32(19):5766-5779.
- 507 24. Stover CK, Pham XQ, Erwin AL, Mizoguchi SD, Warrenner P, Hickey MJ, Brinkman  
508 FS, Hufnagle WO, Kowalik DJ, Lagrou M *et al*: Complete genome sequence of  
509 *Pseudomonas aeruginosa* PAO1, an opportunistic pathogen. *Nature.*  
510 2000;406(6799):959-964.
- 511 25. Wang N, Ozer EA, Mandel MJ, Hauser AR: Genome-wide identification of  
512 *Acinetobacter baumannii* genes necessary for persistence in the lung. *MBio.*  
513 2014;5(3):e01163-01114.
- 514 26. Withers TR, Yin Y, Yu HD: Identification of novel genes associated with alginate  
515 production in *Pseudomonas aeruginosa* using mini-himar1 mariner transposon-  
516 mediated mutagenesis. *J Vis Exp.* 2014;85:51346.
- 517 27. Lewenza S, Falsafi RK, Winsor G, Gooderham WJ, McPhee JB, Brinkman FS,  
518 Hancock RE: Construction of a mini-Tn5-luxCDABE mutant library in *Pseudomonas*  
519 *aeruginosa* PAO1: a tool for identifying differentially regulated genes. *Genome Res.*  
520 2005;15(4):583-589.
- 521 28. Gallagher LA, Shendure J, Manoil C: Genome-scale identification of resistance  
522 functions in *Pseudomonas aeruginosa* using Tn-seq. *MBio.* 2011;2(1):e00315-00310.
- 523 29. Wong SM, Mekalanos JJ: Genetic footprinting with mariner-based transposition in  
524 *Pseudomonas aeruginosa*. *Proc Natl Acad Sci U S A.* 2000;97(18):10191-10196.
- 525 30. Skurnik D, Roux D, Aschard H, Cattoir V, Yoder-Himes D, Lory S, Pier GB: A  
526 comprehensive analysis of in vitro and in vivo genetic fitness of *Pseudomonas*



- 527 aeruginosa using high-throughput sequencing of transposon libraries. PLoS Pathog.  
528 2013;9(9):e1003582.
- 529 31. Liberati NT, Urbach JM, Miyata S, Lee DG, Drenkard E, Wu G, Villanueva J, Wei T,  
530 Ausubel FM: An ordered, nonredundant library of *Pseudomonas aeruginosa* strain  
531 PA14 transposon insertion mutants. Proc Natl Acad Sci U S A. 2006;103(8):2833-  
532 2838.
- 533 32. Seet Q, Zhang LH: Anti-activator QslA defines the quorum sensing threshold and  
534 response in *Pseudomonas aeruginosa*. Mol Microbiol. 2011;80(4):951-965.
- 535 33. Klockgether J, Munder A, Neugebauer J, Davenport CF, Stanke F, Larbig KD, Heeb  
536 S, Schock U, Pohl TM, Wiehlmann L *et al*: Genome diversity of *Pseudomonas*  
537 *aeruginosa* PAO1 laboratory strains. J Bacteriol. 2010;192(4):1113-1121.
- 538 34. Green B, Bouchier C, Fairhead C, Craig NL, Cormack BP: Insertion site preference  
539 of Mu, Tn5, and Tn7 transposons. Mob DNA. 2012;3(1):3.
- 540 35. Goryshin IY, Miller JA, Kil YV, Lanzov VA, Reznikoff WS: Tn5/IS50 target recognition.  
541 Proc Natl Acad Sci U S A. 1998;95(18):10716-10721.
- 542 36. Maier TM, Havig A, Casey M, Nano FE, Frank DW, Zahrt TC: Construction and  
543 characterization of a highly efficient *Francisella* shuttle plasmid. Appl Environ  
544 Microbiol. 2004;70(12):7511-7519.
- 545 37. Enyeart PJ, Mohr G, Ellington AD, Lambowitz AM: Biotechnological applications of  
546 mobile group II introns and their reverse transcriptases: gene targeting, RNA-seq,  
547 and non-coding RNA analysis. Mob DNA. 2014;5(1):2.
- 548 38. Court DL, Sawitzke JA, Thomason LC: Genetic engineering using homologous  
549 recombination. Annu Rev Genet. 2002;36:361-388.

550 39. Saavedra JT, Schwartzman JA, Gilmore MS: Mapping Transposon Insertions in  
551 Bacterial Genomes by Arbitrarily Primed PCR. *Curr Protoc Mol Biol.*  
552 2017;118:15.15.11-15.15.15.

553

554

555 **Figure Legends**

556 **Fig. 1** IPTG-controlled conditional suicide plasmids. **(a)** Plasmid pMMB208 and its  
557 conditional-suicide derivatives. pMMB208 contains an RSF1010 *oriV* for replication and  
558 an *oriT* for conjugation. Genes *repA*, *mobA/repB* and *repC* encode proteins required for  
559 plasmid replication, and *repF* encodes a transcription repressor that binds promoter P4.  
560 pMMB208 also has *Cam<sup>R</sup>* and *lacI<sup>Q</sup>* genes and a *Ptac* promoter. Plasmid pMMB-*repF* is  
561 a derivative of pMMB208 that has a second copy of the *repF* gene inserted downstream  
562 of *Ptac*. Plasmids pMMB-*repAK42A* and pMMB-*repAD139A* have a dominant-negative  
563 *repA* mutant gene, either K42A or D139A, inserted downstream of *Ptac*. **(b)** Amount of  
564 *E. coli* DH10B cells retaining the indicated plasmids after 24 h growth in the absence of  
565 antibiotics, either with or without IPTG induction. Results were average of three  
566 independent experiments, and bars represent mean  $\pm$  SD (standard deviation). \*p <  
567 0.0001, \*\*p < 0.0001, and \*\*\*p < 0.0001 by unpaired Student's t-test for IPTG induced  
568 cultures. **(c)** pMMB208 and its derivatives are digested with *HindIII* (H) and *PstI* (P).  
569 Comparing to pMMB208 and pMMB-*repF*, the *repA* K42A and D139A mutants showed  
570 reduced yields in plasmid minipreps (no IPTG induction; 3.0% and 4.7% of that of  
571 pMMB208, respectively). *HindIII* and *PstI* digestion generates two fragments for each  
572 plasmid. The ~9 kb fragment is seen on the gel, while the shorter ones, ranging from 18  
573 bp for pMMB208 to 861 bp for the *repA* mutants, are not visible. Another large band (~9  
574 kb) is also seen in restriction digestion of pMMB208 and its derivatives, even after  
575 complete digestion, and the cause is unknown.

576

577 **Fig. 2** mTn5 transposon mutagenesis using an IPTG-controlled conditional suicide  
578 plasmid. (a) Diagram of plasmid pSNC-mTn5. pSNC-mTn5 is a derivative of *pMMB-repF*  
579 that contains a *Kan<sup>R</sup>*-tagged mTn5, a *lac* promoter-controlled hyperactive transposase  
580 gene (*tnp<sup>H</sup>*), and a *sacB* counter selection marker (with its own promoter). OE and IE are  
581 outside and inside ends of the mTn5. (b) Plasmid and transposon retention frequencies  
582 in *E. coli* DH10B. A “+” symbol for IPTG indicates that the inducer was added to the liquid  
583 culture, and a “+” symbol for Suc, Cam, and Kan indicates that the chemicals were added  
584 to the plates. Black columns represent plasmid retention frequencies, and the blue  
585 column represents Tn5 retention frequency. Results were average of three independent  
586 experiments, and bars represent mean  $\pm$  SD (\*p < 0.0001 and \*\*p = 0.0054 by unpaired  
587 t-test). (see Materials and Methods for details) (c) Colony restreaking. 150/150 Suc<sup>R</sup>Kan<sup>R</sup>  
588 colonies of DH10B were found to be Kan<sup>R</sup>Cam<sup>S</sup> and 50 are shown here. (d) Colony PCR  
589 of 10 restreaked clones in (c). Primer sets P1&P2 and P3&P4 detect *Kan<sup>R</sup>* and *repF*,  
590 respectively. All were mTn5-positive and plasmid-negative. Primers P3 and P4 are a  
591 functional pair for PCR-amplification of the plasmid sequence (data not shown). (e)  
592 Plasmid and transposon retention frequencies in *A. baylyi*. Results were average of three  
593 independent experiments, and bars represent mean  $\pm$  SD (\*p = 0.024 and \*\*p < 0.0001  
594 by unpaired t-test). (f) Plasmid and transposon retention frequencies in *P. aeruginosa*.  
595 Results were average of three independent experiments, and bars represent mean  $\pm$  SD  
596 (\*p = 0.0013 and \*\*p = 0.0038 by unpaired t-test). Colony restreaking and PCR analysis  
597 are shown in Additional file 1: Figure S2.  
598

599 **Fig. 3** mTn5 insertion sites in different bacteria. **(a)** mTn5 insertion sites in *E. coli* DH10B.  
600 **(b)** mTn5 insertion sites in *A. baylyi* 33305. **(c)** mTn5 insertion sites in *P. aeruginosa*  
601 PAO1. Only the chromosomal sequences next to the OE are shown. The 9 bp duplicated  
602 sequences are shown in capital letters. Identical clones are shown only once, with  
603 numbers indicated in parenthesis. Either gene names or locus tags are given as genetic  
604 locations.

605

606 **Fig. 4** Generation of a *P. aeruginosa* insertion library with pSNC-mTn5ME. **(a)** Diagram  
607 of pSNC-mTn5ME, a derivative of pSNC-mTn5 that has MEs instead of OE and IE at the  
608 termini of mTn5. **(b)** Plasmid and transposon retention frequencies in *E. coli* DH10B.  
609 Results were average of three independent experiments, and bars represent mean  $\pm$  SD  
610 (\* $p < 0.0001$  and \*\* $p = 0.0004$  by unpaired t-test). Colony restreaking and PCR assays  
611 are shown in Additional file 1: Figure S4. **(c)** Plasmid and transposon retention  
612 frequencies in *A. baylyi*. Results were average of three independent experiments, and  
613 bars represent mean  $\pm$  SD (\* $p = 0.0029$  and \*\* $p = 0.0006$  by unpaired t-test). Colony  
614 restreaking and PCR assays are shown in Additional file 1: Figure S5. **(d)** Plasmid and  
615 transposon retention frequencies in *P. aeruginosa* PAO1. Results were average of three  
616 independent experiments, and bars represent mean  $\pm$  SD (\* $p < 0.0001$  and \*\* $p = 0.0065$   
617 by unpaired t-test). Colony restreaking and PCR assays are shown in Additional file 1:  
618 Figure S6. **(e)** Plasmid and transposon retention frequencies in the *P. aeruginosa* PAO1  
619 mutant library generated with pSNC-mTn5ME. **(f)** Colony restreaking. 100/100 Suc<sup>R</sup>Kan<sup>R</sup>  
620 colonies of the mTn5ME library of *P. aeruginosa* were found to be Kan<sup>R</sup>Cam<sup>S</sup>. 50 are  
621 shown here. **(g)** Colony PCR of ten restreaked clones in **(f)** with the indicated primers. All

622 were mTn5-positive and plasmid-negative. **(h)** Transposon insertion sites of 46 mutant  
623 clones from the mTn5ME insertion library of *P. aeruginosa*. Identical clones are shown  
624 only once, with their duplication numbers indicated in parenthesis.

625

## 626 **Additional files**

627 **Additional file 1: Figure S1.** Tn5 transposons. **(a)** Full-length Tn5. The full-length Tn5  
628 contains two inverted IS50 elements at its ends. Only one of them encodes an active  
629 Tnp and an Inh (Inhibitor of Tnp). *Kan<sup>R</sup>*, kanamycin-resistance gene; *Str<sup>R</sup>*, streptomycin-  
630 resistance gene; and *Ble<sup>R</sup>*, bleomycin-resistance gene. **(b)** mTn5s. Top, an mTn5 with  
631 an OE and an IE at the termini. Bottom, an mTn5 with MEs at the ends. **(c)** Comparison  
632 of OE, IE and ME, with their polymorphisms highlighted in red.

633

634 **Additional file 1: Figure S2.** Confirmation of mTn5 transposition events in *A. baylyi*  
635 and in *P. aeruginosa*. **(a)** Colony restreaking assay of *A. baylyi*. 100 Suc<sup>R</sup>Kan<sup>R</sup> colonies  
636 of *A. baylyi* were restreaked on LB+Kan and LB+Cam plates, and all were found to be  
637 Kan<sup>R</sup>Cam<sup>S</sup>. 50 are shown here. **(b)** Colony PCR of 10 restreaked *A. baylyi* clones with  
638 the indicated primers. All were mTn5-positive and plasmid-negative. **(c)** Colony  
639 restreaking assay of *P. aeruginosa*. 100 Suc<sup>R</sup>Kan<sup>R</sup> colonies of *P. aeruginosa* were  
640 restreaked on LB+Kan and LB+Cam plates, and all were found to be Kan<sup>R</sup>Cam<sup>S</sup>. 50 are  
641 shown here. **(d)** Colony PCR of ten restreaked *P. aeruginosa* clones with primers  
642 indicated in the diagram. All were mTn5-positive and plasmid-negative.

643

644 **Additional file 1: Figure S3.** A transposon insertion library of *P. aeruginosa* PAO1  
645 generated with pSNC-mTn5. (a) Plasmid and transposon retention frequencies of the  
646 mTn5 insertion library of *P. aeruginosa* PAO1. (b) Colony restreaking assay. 100  
647 random Suc<sup>R</sup>Kan<sup>R</sup> colonies were restreaked on LB+Kan and LB+Cam plates. 100/100  
648 were found to be Kan<sup>R</sup>Cam<sup>S</sup> and 50 are shown here. (c) Colony PCR of ten restreaked  
649 clones in (b). All were found to be mTn5-positive and plasmid-negative. (d) mTn5  
650 insertion sites of 37 mutant clones from the transposon insertion library of *P.*  
651 *aeruginosa*. Identical clones are only shown once, and their numbers are indicated in  
652 parenthesis.

653

654 **Additional file 1: Figure S4.** Confirmation of mTn5ME transposition events in *E. coli*  
655 DH10B. (a) Colony restreaking. 100 random Suc<sup>R</sup>Kan<sup>R</sup> colonies of *E. coli* were  
656 restreaked on LB+Kan and LB+Cam plates. 100/100 were found to be Kan<sup>R</sup>Cam<sup>S</sup> and  
657 50 restreaked colonies are shown here. (b) Colony PCR of ten restreaked clones in (a).  
658 All were found to be Tn5-positive and plasmid-negative. (c) Tn5 insertion sites of 13  
659 independent DH10B clones.

660

661 **Additional file 1: Figure S5.** Confirmation of mTn5ME transposition events in *A. baylyi*  
662 33305. (a) Colony restreaking. 100 random Suc<sup>R</sup>Kan<sup>R</sup> colonies of *A. baylyi* were  
663 restreaked on LB+Kan and LB+Cam plates. 100/100 were found to be Kan<sup>R</sup>Cam<sup>S</sup> and  
664 50 restreaked colonies are shown here. (b) Colony PCR of ten restreaked clones in (a).  
665 All were found to be Tn5-positive and plasmid-negative. (c) Sequence analysis shows  
666 that 9/14 *A. baylyi* clones had different Tn5 insertion sites.

667

668 **Additional file 1: Figure S6.** Confirmation of mTn5ME transposition events in *P.*

669 *aeruginosa* PAO1. (a) Colony restreaking. 100 random Suc<sup>R</sup>Kan<sup>R</sup> colonies of *P.*

670 *aeruginosa* PAO1 were restreaked on LB+Kan and LB+Cam plates. 100/100 were

671 found to be Kan<sup>R</sup>Cam<sup>S</sup> and 50 restreaked colonies are shown here. (b) Colony PCR of

672 ten restreaked clones in (a). All were found to be Tn5-positive and plasmid-negative. (c)

673 Sequence analysis shows that 7/10 *P. aeruginosa* clones had different Tn5 insertion

674 sites.

675

676 **Additional file 1: Figure S7.** Target site preferences of mTn5 and mTn5ME in *P.*

677 *aeruginosa*. (a) Sequence logo of mTn5 insertion sites generated with WebLogo. 40

678 target sequences were analyzed. The 9 bp duplicated sequences adjacent to the OE

679 are shown. There is a slight preference for certain nucleotides at several positions. (b)

680 Sequence logo of mTn5ME insertion sites. 41 target sequences were analyzed. The 9

681 bp duplicated sequences adjacent to an ME are shown. It appears that mTn5ME has

682 less nucleotide preference at the duplicated target sequence than mTn5 in

683 *Pseudomonas*.

684

685 **Additional file 1: Table S1.** Comparison of conditional suicide vector-based transposon

686 mutagenesis strategies used in Gram-negative bacteria.

687

688 **Additional file 1: Table S2.** List of primers used.



**Fig. 1**

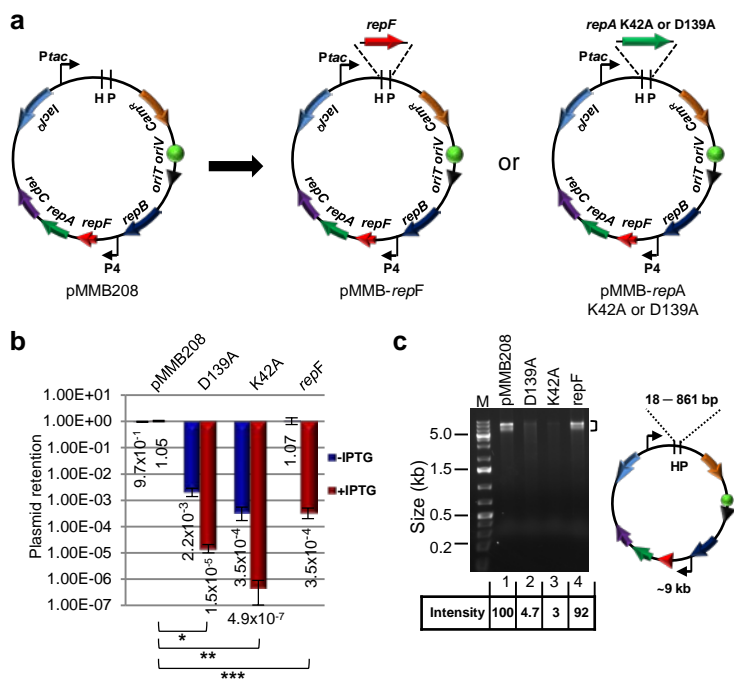

**Fig. 2**

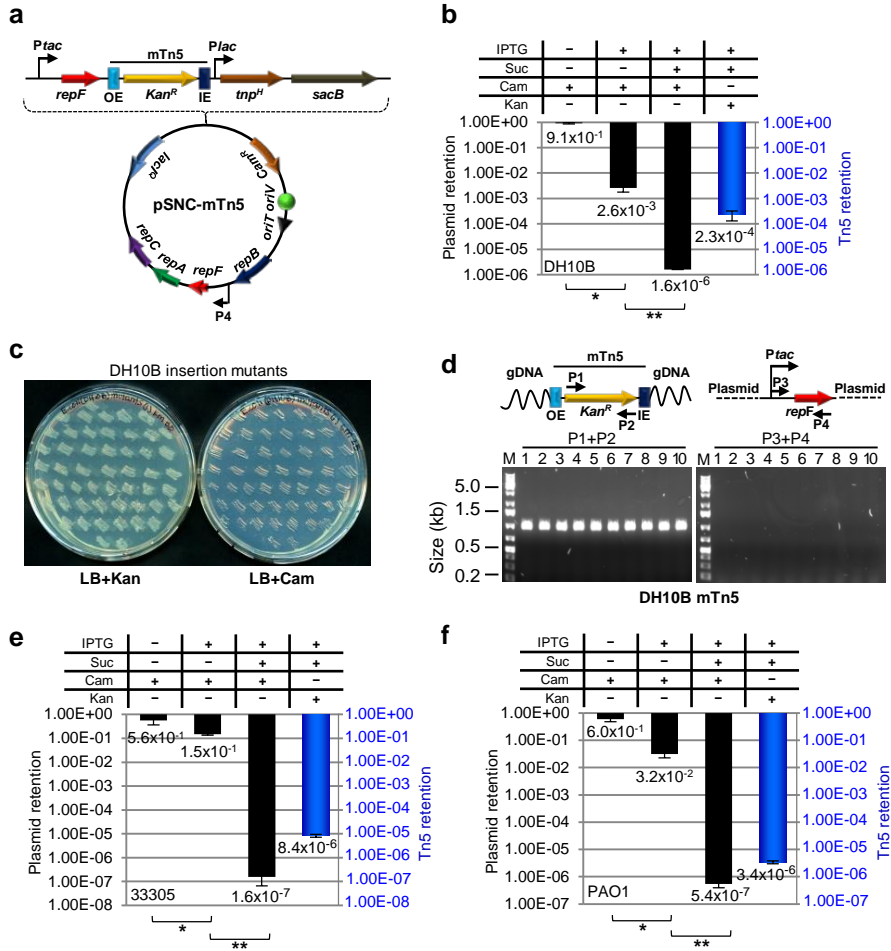

**Fig. 3**

**a**

| <i>E. coli</i> DH10B |                                           |                            |
|----------------------|-------------------------------------------|----------------------------|
| Clone                | Target sequence<mTn5>                     | Genetic location           |
| E1                   | acttatgGATTGCACG<OE-kan <sup>R</sup> -IE> | <i>yjeV</i>                |
| E2                   | tttgctgGGCAAAGGC<OE-kan <sup>R</sup> -IE> | <i>mtr</i>                 |
| E3                   | tggcaacAGCCTGAAC<OE-kan <sup>R</sup> -IE> | <i>crcA</i>                |
| E4                   | ccacgcaGATTATGCC<OE-kan <sup>R</sup> -IE> | <i>insF-1</i> <sup>a</sup> |
| E5                   | cgccaccGTGTAGGG<OE-kan <sup>R</sup> -IE>  | Intergenic                 |
| E6                   | tttggtacGTATGTAC<OE-kan <sup>R</sup> -IE> | <i>yeaS</i>                |
| E7                   | cttatacGGCCTAGGC<OE-kan <sup>R</sup> -IE> | Intergenic <sup>b</sup>    |
| E8                   | gcaattagCCCGGTC<OE-kan <sup>R</sup> -IE>  | <i>eda</i>                 |
| E9                   | cgcgcgGTGCTGGGC<OE-kan <sup>R</sup> -IE>  | <i>ltaE</i>                |
| E10                  | gcttcaaGGATAGAGC<OE-kan <sup>R</sup> -IE> | <i>yagL</i>                |
| E11                  | tagggtagAGACGCAG<OE-kan <sup>R</sup> -IE> | <i>yahB</i>                |
| E12                  | ctttacaCCTTAAGGC<OE-kan <sup>R</sup> -IE> | Intergenic                 |
| E13                  | tcagtcctCTTCACC<OE-kan <sup>R</sup> -IE>  | <i>yjhS</i>                |

<sup>a</sup> One of the five probable target sites

<sup>b</sup> One of the seven probable target sites

**b**

| <i>A. baylyi</i> 33305 |                                                                    |                  |
|------------------------|--------------------------------------------------------------------|------------------|
| Clone                  | Target sequence<mTn5>                                              | Genetic location |
| A1                     | aggtgtaGCGGTGAAA<OE-kan <sup>R</sup> -IE>                          | 16S rRNA         |
| A2                     | tcactctGGTATAAAG<OE-kan <sup>R</sup> -IE>                          | ACIAD1176        |
| A3                     | gcgtaaatTTAAAGGC<OE-kan <sup>R</sup> -IE>                          | <i>UvrB</i>      |
| A4                     | gtctacaGATCAAGCT<OE-kan <sup>R</sup> -IE>                          | <i>pilU</i>      |
| A5                     | cat t g a a G A C T T A A G C < O E - k a n <sup> R </sup> - I E > | ACIAD2819        |
| A6                     | ttttactGTATTGGAC<OE-kan <sup>R</sup> -IE>                          | ACIAD0088        |
| A7                     | ggacattACCGAAGCC<OE-kan <sup>R</sup> -IE>                          | ACIAD0046        |
| A8                     | tggagcaACTTGATGC<OE-kan <sup>R</sup> -IE>                          | <i>pilI</i>      |
| A9                     | tatcaaaGTCTAAAGC<OE-kan <sup>R</sup> -IE>                          | ACIAD3001        |

**c**

| <i>P. aeruginosa</i> PAO1 |                                           |                  |
|---------------------------|-------------------------------------------|------------------|
| Clone                     | Target sequence<mTn5>                     | Genetic location |
| P1                        | ttaacgcaCCGCAAGG<OE-kan <sup>R</sup> -IE> | Intergenic       |
| P2                        | tcgacaaCGATAAGGT<OE-kan <sup>R</sup> -IE> | <i>flgM</i>      |
| P3                        | ccagaagGCGGCAGC<OE-kan <sup>R</sup> -IE>  | Intergenic(2)    |
| P4                        | tctagtGCC TAGGAC<OE-kan <sup>R</sup> -IE> | tRNA-Glu         |
| P5                        | tgaccaaGGTCTGCTC<OE-kan <sup>R</sup> -IE> | <i>tufa</i>      |
| P7                        | tcccccaGGCGGACG<OE-kan <sup>R</sup> -IE>  | PA3806           |
| P8                        | agccgcaCACCAGTT<OE-kan <sup>R</sup> -IE>  | <i>tufa</i>      |
| P9                        | tccaaCGCATGGGCC<OE-kan <sup>R</sup> -IE>  | <i>trpB</i>      |
| P10                       | taggataGGTGGGAGC<OE-kan <sup>R</sup> -IE> | 23S rRNA         |
| P11                       | ccccgcGCCCAAGGC<OE-kan <sup>R</sup> -IE>  | Intergenic(2)    |
| P13                       | gggggatCTTCGGACC<OE-kan <sup>R</sup> -IE> | 16S rRNA         |

**Fig. 4**

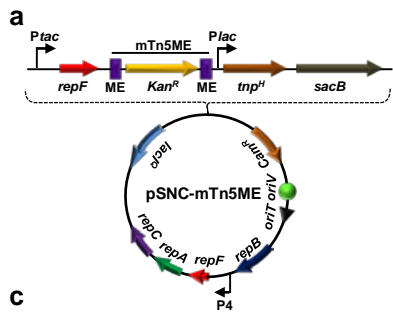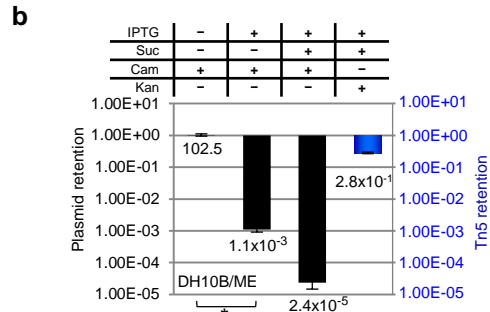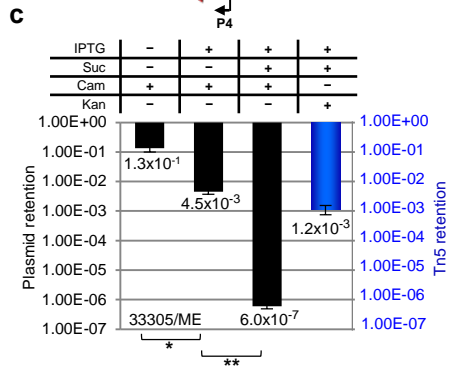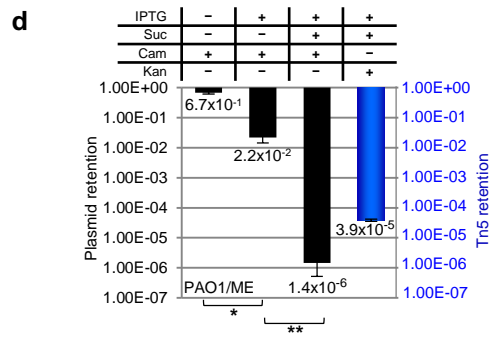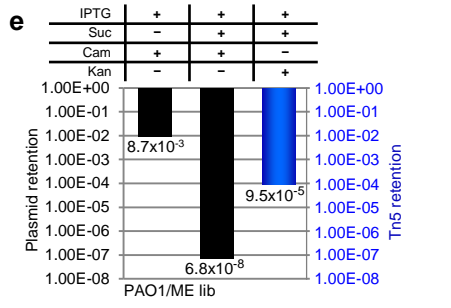

**h**

*P. aeruginosa* PAO1/ME lib

| Clone | Target sequence<miniTn5>                    | Genetic location |
|-------|---------------------------------------------|------------------|
| P1    | ccccgcaGCCACAGGC<ME-kan <sup>R</sup> -ME>   | Intergenic (3)   |
| P2    | ttgagagGGGCTGCTC<ME-kan <sup>R</sup> -ME>   | 23S rRNA (2)     |
| P3    | ggctcaaCCTGGGAAC<ME-kan <sup>R</sup> -ME>   | 16S rRNA         |
| P4    | ggaacccaCCTGATCCC<ME-kan <sup>R</sup> -ME>  | 5S rRNA (2)      |
| P5    | gcatgcaCGGCGTGGC<ME-kan <sup>R</sup> -ME>   | <i>trpB</i>      |
| P6    | gtgttaaCGCGGAAT<ME-kan <sup>R</sup> -ME>    | tRNA-gly         |
| P7    | acaagcaGTGGAGCC<ME-kan <sup>R</sup> -ME>    | 23S rRNA         |
| P8    | ccacctagGATAACCT<ME-kan <sup>R</sup> -ME>   | 23S rRNA (2)     |
| P9    | cgccaaagGCATTTCCC<ME-kan <sup>R</sup> -ME>  | <i>iscR</i>      |
| P10   | agaagctTGCTGGAGC<ME-kan <sup>R</sup> -ME>   | 23S rRNA         |
| P11   | gtactgaATCCATAGC<ME-kan <sup>R</sup> -ME>   | 23S rRNA         |
| P12   | tcggtctGGTATGATC<ME-kan <sup>R</sup> -ME>   | Intergenic       |
| P13   | ccgtataGGGTAGGCG<ME-kan <sup>R</sup> -ME>   | 23S rRNA (2)     |
| P14   | ggcatctGCACCCACC<ME-kan <sup>R</sup> -ME>   | PA4431           |
| P15   | gaggacaGTGTATGTT<ME-kan <sup>R</sup> -ME>   | 23S rRNA (4)     |
| P16   | cgatgctGAACAAGTC<ME-kan <sup>R</sup> -ME>   | <i>rpmI</i>      |
| P17   | cgaagcaGGTTAGTC<ME-kan <sup>R</sup> -ME>    | 23S rRNA (3)     |
| P18   | ccgtaaGGTTCGAGC<ME-kan <sup>R</sup> -ME>    | Intergenic       |
| P19   | cggcgctGCTCCACC<ME-kan <sup>R</sup> -ME>    | 23S rRNA         |
| P20   | gcgaaaGCTTCGGGG<ME-kan <sup>R</sup> -ME>    | 23S rRNA         |
| P21   | tggttctGTATGAGAC<ME-kan <sup>R</sup> -ME>   | 23S rRNA         |
| P22   | agccgcaCACCAAGTT<ME-kan <sup>R</sup> -ME>   | <i>tufA(2)</i>   |
| P23   | gatcggaGTAAAGGC<ME-kan <sup>R</sup> -ME>    | 23S rRNA         |
| P24   | ccaagcaGTATTGAAC<ME-kan <sup>R</sup> -ME>   | Intergenic       |
| P25   | acgacgaGCTGAAAGC<ME-kan <sup>R</sup> -ME>   | <i>cyoB</i>      |
| P26   | gaaggtTAGTAAACAC<ME-kan <sup>R</sup> -ME>   | 23S rRNA (2)     |
| P27   | cgotgagGCCAGCCT<ME-kan <sup>R</sup> -ME>    | <i>prs</i>       |
| P28   | gctcaactAGTCAGTC<ME-kan <sup>R</sup> -ME>   | 23S rRNA         |
| P29   | agtgaagCGGTAGAGC<ME-kan <sup>R</sup> -ME>   | 23S rRNA         |
| P30   | gcgcgagGAGCTGAAC<ME-kan <sup>R</sup> -ME>   | <i>trpB</i>      |
| P31   | ccccaaaaCCCCCTGGTC<ME-kan <sup>R</sup> -ME> | Intergenic       |
| P32   | agggggtCATCCCAGC<ME-kan <sup>R</sup> -ME>   | 23S rRNA         |
| P33   | ggtgaagGATTTACTC<ME-kan <sup>R</sup> -ME>   | 23S rRNA         |
| P34   | ttccggtTGTCACGCC<ME-kan <sup>R</sup> -ME>   | 23S rRNA         |

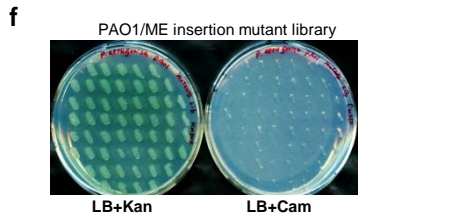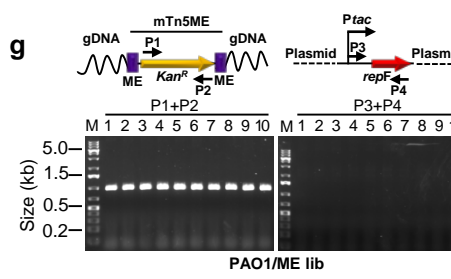

Source: http://biorxiv.org/content/10.1101/419473v1.full.pdf
